# Supplementary material for: Enteric glia regulate Paneth cell secretion and intestinal microbial ecology
Source: eLife. 2025 Apr 14;13:RP97144. doi: 10.7554/eLife.97144 (PMC11996175; doi:10.7554/eLife.97144)
Supplement: Source data 1. [file elife-97144-data1.xlsx]

## Sheet: Figure 1
Figure	mouse ID	tissue	sex	image	PLP1+ only cells	GFAP+ only cells	PLP1+ GFAP+ double positive cells	Total Cells	%PLP1+ only cells (out of total cells)	%GFAP+ only cells (out of total cells)	%PLP1+ GFAP+ double positive cells (out of total cells)
Figure 1D	PLPGFP #1	ileum - crypts	female	1	44	0	15	59	74.5763	0	25.4237
				2	23	0	2	25	92	0	8
				3	49	0	13	62	79.0323	0	20.9677
				4	35	0	4	39	89.7436	0	10.2564
				5	50	0	4	54	92.5926	0	7.40741
				6	22	0	4	26	84.6154	0	15.3846
				7	21	0	2	23	91.3043	0	8.69565
				8	38	0	6	44	86.3636	0	13.6364
				9	19	0	8	27	70.3704	0	29.6296
				10	30	0	2	32	93.75	0	6.25
					331	0	60	391	84.6547	0	15.3453
Figure 1D	PLPGFP #2	ileum - crypts	female	1	11	0	9	20	55	0	45
				2	12	0	11	23	52.1739	0	47.8261
				3	26	0	7	33	78.7879	0	21.2121
				4	16	0	9	25	64	0	36
				5	45	0	12	57	78.9474	0	21.0526
				6	73	0	3	76	96.0526	0	3.94737
				7	66	0	4	70	94.2857	0	5.71429
				8	45	0	3	48	93.75	0	6.25
				9	49	0	2	51	96.0784	0	3.92157
				10	80	0	3	83	96.3855	0	3.61446
					423	0	63	486	87.037	0	12.963
Figure 1D	PLPGFP #3	ileum - crypts	male	1	28	0	3	31	90.3226	0	9.67742
				2	58	1	4	63	92.0635	1.5873	6.34921
				3	90	0	4	94	95.7447	0	4.25532
				4	87	0	0	87	100	0	0
				5	75	0	1	76	98.6842	0	1.31579
				6	68	0	1	69	98.5507	0	1.44928
				7	72	0	0	72	100	0	0
				8	93	1	5	99	93.9394	1.0101	5.05051
				9	77	0	0	77	100	0	0
				10	60	0	1	61	98.3607	0	1.63934
					708	2	19	729	97.1193	0.274348	2.60631
Figure 1D	PLPGFP #4	ileum - crypts	male	1	72	0	4	76	94.7368	0	5.26316
				2	64	0	6	70	91.4286	0	8.57143
				3	73	0	2	75	97.3333	0	2.66667
				4	45	0	1	46	97.8261	0	2.17391
				5	31	1	6	38	81.5789	2.63158	15.7895
				6	35	1	5	41	85.3659	2.43902	12.1951
				7	56	0	3	59	94.9153	0	5.08475
				8	40	0	0	40	100	0	0
				9	102	0	0	102	100	0	0
				10	67	0	2	69	97.1014	0	2.89855
					585	2	29	616	94.9675	0.324675	4.70779
Figure 1D	PLPGFP #1	ileum - villi	female	1	0	0	21	21	0	0	100
				2	0	0	22	22	0	0	100
				3	1	0	15	16	6.25	0	93.75
				4	0	0	22	22	0	0	100
				5	0	0	19	19	0	0	100
				6	0	0	22	22	0	0	100
				7	1	1	23	25	4	4	92
				8	0	0	15	15	0	0	100
				9	3	0	11	14	21.4286	0	78.5714
				10	0	1	21	22	0	4.54545	95.4545
					5	2	191	198	2.52525	1.0101	96.4646
Figure 1D	PLPGFP #2	ileum - villi	female	1	1	0	14	15	6.66667	0	93.3333
				2	2	0	11	13	15.3846	0	84.6154
				3	0	0	13	13	0	0	100
				4	2	0	10	12	16.6667	0	83.3333
				5	2	0	15	17	11.7647	0	88.2353
				6	2	0	16	18	11.1111	0	88.8889
				7	3	0	12	15	20	0	80
				8	0	0	15	15	0	0	100
				9	2	0	14	16	12.5	0	87.5
				10	2	0	12	14	14.2857	0	85.7143
					16	0	132	148	10.8108	0	89.1892
Figure 1D	PLPGFP #3	ileum - villi	male	1	2	0	17	19	10.5263	0	89.4737
				2	0	0	15	15	0	0	100
				3	0	0	19	19	0	0	100
				4	1	0	17	18	5.55556	0	94.4444
				5	1	0	24	25	4	0	96
				6	3	0	22	25	12	0	88
				7	1	0	24	25	4	0	96
				8	1	0	20	21	4.7619	0	95.2381
				9	4	0	16	20	20	0	80
				10	12	0	5	17	70.5882	0	29.4118
					25	0	179	204	12.2549	0	87.7451
Figure 1D	PLPGFP #4	ileum - villi	male	1	1	0	15	16	6.25	0	93.75
				2	2	0	14	16	12.5	0	87.5
				3	5	0	8	13	38.4615	0	61.5385
				4	3	0	12	15	20	0	80
				5	4	0	16	20	20	0	80
				6	4	0	20	24	16.6667	0	83.3333
				7	3	0	18	21	14.2857	0	85.7143
				8	6	0	10	16	37.5	0	62.5
				9	9	0	9	18	50	0	50
				10	4	0	14	18	22.2222	0	77.7778
					41	0	136	177	23.1638	0	76.8362

## Sheet: Figure 2 Supp. Figure 2
Figure	mouse ID	Genotype	Sex	tissue	Epcam Ct Mean	Epcam Ct SD	Lyz1 Ct Mean	Lyz1 Ct SD	dCt	2^(-dCt)
Figure 2 - Supplementary Figure 2	O	Cre+	male	proximal colon	14.2763	0.304641	23.7962	0.211705	9.51994	0.00136211
	P	Cre+	male	proximal colon	14.5873	0.0910786	24.5248	0.13007	9.93752	0.00101978
	Q	Cre-	male	proximal colon	14.2538	0.0561945	24.6865	0.0991899	10.4327	0.000723531
	S	Cre-	male	proximal colon	14.6321	0.290783	24.5187	0.108472	9.88662	0.00105641
	T	Cre-	male	proximal colon	14.1015	0.0673855	24.4043	0.192927	10.3028	0.000791669
	U	Cre-	male	proximal colon	14.9747	0.338916	26.0244	0.147239	11.0497	0.000471733
	V	Cre-	male	proximal colon	14.0518	0.322793	24.8945	0.128719	10.8427	0.000544527
	W	Cre-	male	proximal colon	13.8667	0.10203	24.3982	0.0303412	10.5315	0.000675636
	X	Cre-	male	proximal colon	14.0918	0.0781503	24.8238	0.744846	10.732	0.000587951
	Y	Cre+	male	proximal colon	13.9966	0.16121	23.8228	0.512852	9.8262	0.00110159
	Z	Cre+	male	proximal colon	14.2933	0.12973	24.047	0.113266	9.75362	0.00115842

## Sheet: Figure 3
Figure	mouse ID	sex	genotype	Region of swiss roll analyzed	# of crypts/scan counted	# of LYZ1+ cells/scan counted	# of LYZ1+ cells/crypt		Figure	mouse ID	sex	genotype	image	MFI/image		Figure	mouse ID	sex	genotype	image	# of villi-crypt units	# of AB+ cells/villi-crypt unit			Figure	mouse ID	sex	genotype	image	# of villi	# of ChgA+ cell in villi	# of crypts	# of ChgA+ cell in crypts
Figure_3C Paneth cells	F1 4.17.18	female	Cre-	distal ileum	50	96	1.92		Figure_3C Lgr5+ cells	M1	male	Cre+	1	20.57		Figure_3C Goblet Cells	F4	female	Cre-	1	1	15			Figure_3C EEC	B23_3	female	Cre+	1	6	5	13	9
	F2 4.17.18	female	Cre+		50	115	2.3						2	16.05						2	2	13							2	4	2	12	6
	F3 4.17.18	female	Cre+		50	79	1.58						3	58.546								14							3	2	1	7	5
	F5 6.08.18	female	Cre-		50	143	2.86						4	55.522						3	1	8							4	5	4	9	4
	F6 6.08.18	female	Cre+		50	185	3.7						5	12.41						4	2	14							5	1	0	3	3
	F7 6.08.18	female	Cre-		50	155	3.1						6	73.324								10							6	5	6	13	12
	M2 6.08.18	male	Cre+		50	157	3.14							39.4037						5	2	16							7	1	0	3	4
	M3 6.08.18	male	Cre+		50	103	2.06		Figure_3C Lgr5+ cells	M2	male	Cre-	1	28.18								18							8	3	4	10	6
	M8 6.08.18	male	Cre-		50	119	2.38						2	41.276						6	1	11							9	4	10	9	7
													3	19.72						7	1	16							10	2	3	5	2
													4	17.225						8	2	14							11	2	6	6	6
													5	19.132								12							12	1	0	3	3
													6	26.993						9	1	12							13	3	2	6	8
													7	29.542						10	2	12							14	3	2	5	3
														26.0097								15								42	45	104	78	1.82143
									Figure_3C Lgr5+ cells	F3	female	Cre-	1	46.078						11	1	11			Figure_3C EEC	B23_1	female	Cre-	1	2	5	6	2
													2	45.527						12	1	17							2	2	3	5	4
													3	55.082						13	1	12							3	2	3	4	4
													4	23.585						14	1	13							4	5	4	11	11
													5	62.304						15	2	17							5	2	8	8	10
													6	47.847								7							6	7	7	19	19
														46.7372						16	1	13							7	6	12	21	21
									Figure_3C Lgr5+ cells	F4	female	Cre+	1	43.808						17	1	15							8	4	6	12	9
													2	52.928							23	305	13.2609						9	4	8	8	6
													3	67.624		Figure_3C Goblet Cells	F6	female	Cre+	1	1	12							10	7	14	13	17
													4	60.976						2	2	12							11	4	9	9	15
													5	34.284								18							12	8	12	20	30
													6	61.976						3	1	21							13	2	3	5	6
													7	60.504						4	2	23							14	2	2	5	4
													8	44.749								17							15	3	5	7	12
													9	54.829						5	2	9							16	3	8	7	8
														53.5198								14								63	109	160	178	2.84266
									Figure_3C Lgr5+ cells	F5	female	Cre+	1	32.302						6	1	16			Figure_3C EEC	B29_1	female	Cre+	1	4	5	8	5
													2	88.624						7	2	17							2	4	1	14	16
													3	61.637								18							3	2	2	3	6
													4	69.044						8	1	15							4	2	2	2	4
													5	76.996						9	1	15							5	3	3	7	2
													6	83.881						10	1	12							6	4	4	7	3
													7	86.339						11	1	17							7	1	1	4	2
														71.2604						12	1	13							8	3	6	10	7
									Figure_3C Lgr5+ cells	F6	female	Cre+	1	74.82						13	2	11							9	3	3	7	4
													2	74.477								18							10	1	3	2	2
													3	68.684						14	1	15								27	30	64	51	1.90799
													4	65.966						15	1	20			Figure_3C EEC	B29_10	male	Cre+	1	2	6	6	5
													5	43.431						16	1	21							2	2	2	6	7
													6	41.97						17	1	20							3	4	9	9	11
														61.558							22	354	16.0909						4	3	2	7	7
									Figure_3C Lgr5+ cells	F7	female	Cre-	1	50.186		Figure_3C Goblet Cells	M5	male	Cre-	1	1	11							5	2	8	6	8
													2	75.405						2	1	15							6	3	5	6	5
													3	63.395						3	1	15							7	3	4	5	6
													4	55.06						4	1	11							8	3	4	8	9
													5	68.413						5	1	20							9	3	7	8	8
														62.4918						6	1	13							10	4	6	7	8
									Figure_3C Lgr5+ cells	F8	female	Cre-	1	57.569						7	1	14							11	4	4	10	9
													2	79.391						8	1	14							12	1	2	2	4
													3	61.627						9	1	15							13	4	4	7	3
													4	63.643						10	1	18							14	7	7	13	16
													5	64.465						11	1	16								45	70	100	106	2.61556
													6	68.472						12	1	13			Figure_3C EEC	B29_9	male	Cre-	1	4	5	12	8
														65.8612						13	1	19							2	3	2	6	7
																				14	1	16							3	4	3	9	9
																				15	1	8							4	2	3	3	3
																				16	1	12							5	2	1	6	4
																				17	1	17							6	3	4	8	11
																				18	1	15							7	2	3	5	6
																				19	1	15							8	5	5	12	15
																					19	277	14.5789						9	2	4	6	6
																Figure_3C Goblet Cells	M7	male	Cre+	1	1	16							10	1	1	4	4
																				2	2	10							11	2	1	6	8
																						13							12	2	3	7	8
																				3	3	11							13	3	4	11	17
																						10							14	2	3	6	5
																						12							15	5	10	10	10
																				4	2	9							16	6	9	13	17
																						14							17	4	3	8	9
																				5	1	16								52	64	132	147	2.34441
																				6	1	14			Figure_3C EEC	B29_3	female	Cre-	1	5	8	14	10
																				7	1	18							2	2	3	3	2
																				8	1	11							3	5	8	13	18
																				9	1	9							4	2	0	5	5
																					13	163	12.5385						5	3	3	9	1
																Figure_3C Goblet Cells	M8	male	Cre-	1	1	16							6	4	6	13	10
																				2	1	15							7	2	6	7	7
																				3	1	13							8	5	3	10	12
																				4	1	19							9	4	4	12	12
																				5	1	22							10	3	0	8	7
																				6	1	10							11	2	4	6	8
																				7	1	18							12	4	4	8	10
																				8	1	14							13	2	2	6	3
																				9	1	12							14	4	5	9	8
																				10	1	15							15	6	6	13	10
																				11	1	20								53	62	136	123	2.07422
																				12	1	11			Figure_3C EEC	B42_3	female	Cre+	1	3	5	5	2
																				13	1	16							2	4	5	12	8
																				14	1	13							3	6	7	8	3
																				15	2	11							4	2	5	4	2
																						14							5	4	4	9	4
																				16	1	11							6	3	5	6	5
																				17	1	20							7	3	1	8	2
																					18	270	15						8	3	1	9	1
																Figure_3C Goblet Cells	M10	male	Cre+	1	2	21							9	4	9	7	9
																						23							10	3	4	7	6
																				2	1	14							11	4	3	10	3
																				3	1	10							12	2	2	5	8
																				4	1	10							13	3	4	12	5
																				5	4	15								44	55	102	58	1.81863
																						16			Figure_3C EEC	B42_4	female	Cre-	1	4	6	6	5
																						13							2	4	2	9	7
																						14							3	4	3	6	3
																				6	1	14							4	5	9	7	9
																				7	1	17							5	4	4	8	6
																				8	2	17							6	4	6	10	15
																						17							7	4	4	7	5
																				9	1	16							8	9	9	14	19
																				10	1	14							9	4	3	15	10
																				11	1	13							10	4	3	9	7
																				12	1	14							11	3	4	10	3
																				13	1	20								49	53	101	89	1.96282
																				14	2	9
																						16
																				15	1	20
																				16	1	14
																				17	1	12
																				18	1	11
																					24	360	15
																Figure_3C Goblet Cells	F6_6.8.18	female	Cre+	1	2	9
																						11
																				2	2	11
																						12
																				3	2	10
																						12
																				4	1	9
																				5	1	8
																				6	1	10
																				7	1	10
																				8	1	11
																				9	1	7
																				10	1	11
																				11	1	8
																				12	1	7
																					15	146	9.73333
																Figure_3C Goblet Cells	F7_6.8.18	female	Cre+	1	2	10
																						14
																				2	1	14
																				3	2	13
																						16
																				4	2	8
																						9
																				5	1	17
																				6	1	6
																				7	1	14
																				8	1	11
																				9	3	9
																						13
																						12
																				10	2	10
																						16
																					16	192	12
																Figure_3C Goblet Cells	F5_6.8.18	female	Cre+	1	1	13
																				2	2	14
																						14
																				3	2	17
																						19
																				4	2	16
																						19
																				5	1	15
																				6	2	7
																						13
																				7	1	19
																				8	2	11
																						19
																				9	2	12
																						13
																				10	1	10
																				11	2	17
																						15
																				12	2	14
																						12
																				13	1	14
																				14	1	12
																				15	1	10
																					23	325	14.1304
																Figure_3C Goblet Cells	B2_3_11dpt	male	Cre-	1	2	21
																						13
																				2	3	10
																						18
																						15
																				3	3	17
																						12
																						8
																				4	1	18
																				5	2	16
																						18
																				6	2	16
																						13
																				7	1	8
																				8	3	13
																						14
																						10
																				9	1	19
																				10	2	13
																						19
																				11	2	9
																						11
																				12	1	18
																				13	2	15
																						18
																				14	1	24
																				15	1	17
																				16	1	10
																				17	2	15
																						13
																				18	2	17
																						20
																					32	478	14.9375
																Figure_3C Goblet Cells	B2_5_11dpt	female	Cre-	1	2	24
																						21
																				2	2	24
																						18
																				3	1	16
																				4	1	13
																				5	2	18
																						12
																				6	1	19
																				7	1	20
																				8	1	17
																				9	1	15
																				10	1	18
																				11	1	10
																				12	1	9
																				13	1	24
																					16	278	17.375
																Figure_3C Goblet Cells	B2_6_11dpt	male	Cre+	1	1	24
																				2	1	21
																				3	1	18
																				4	1	17
																				5	1	21
																				6	1	20
																				7	3	13
																						14
																						27
																				8	2	16
																						14
																				9	1	21
																				10	1	14
																				11	1	14
																				12	1	10
																				13	1	16
																				14	1	8
																				15	1	24
																				16	1	12
																					19	324	17.0526
																Figure_3C Goblet Cells	B3_1_11dpt	male	Cre-	1	2	19
																						21
																				2	2	23
																						15
																				3	2	26
																						13
																				4	1	25
																				5	2	18
																						20
																				6	2	21
																						21
																				7	1	15
																				8	1	15
																				9	1	14
																				10	1	17
																				11	1	19
																				12	1	17
																				13	1	12
																				14	1	12
																					19	343	18.0526
																Figure_3C Goblet Cells	B3_8_11dpt	male	Cre+	1	1	8
																				2	1	25
																				3	7	13
																						15
																						14
																						18
																						11
																						12
																						10
																				4	2	14
																						18
																					11	158	14.3636
																Figure_3C Goblet Cells	B7_3_11dpt	female	Cre+	1	1	17
																				2	5	7
																						7
																						9
																						13
																						7
																				3	3	11
																						6
																						14
																				4	1	14
																				5	1	10
																				6	1	8
																				7	1	18
																				8	1	26
																				9	4	10
																						9
																						8
																						15
																				10	1	14
																				11	1	18
																					20	241	12.05
																Figure_3C Goblet Cells	B7_4_11dpt	female	Cre-	1	1	23
																				2	1	14
																				3	1	8
																				4	1	13
																				5	1	10
																				6	1	13
																				7	1	16
																				8	2	23
																						19
																				9	1	18
																				10	2	21
																						19
																					12	197	16.4167

## Sheet: Figure 5
Figure	Explant ID	Sex	Genotype	Treatment	Average fluorescnece	4-MU [pmol]	Lysozyme activity [pmol/min]	LYZ activity adjusted		Explant ID	Sex	Genotype	Average fluorescnece	4-MU [pmol]	Lysozyme activity [pmol/min]	Protein content [ug]	LYZ activity adjusted
Figure 5 C	008_A	males	WT	-	14110	28.2676	188.451	0.188451		A	male	Cre-	16295	60.1349	261.456	1309.5	0.199661
	008_C			DTZ	26502	53.4076	356.051	0.356051		B	male	Cre+	6397	23.3762	101.636	2427.5	0.0418685
	008_D			DTZ + CARB	7858	15.584	103.893	0.103893		P	male	Cre-	1485.5	5.13618	22.3312	30.3	0.737004
	008_E			0	15279.5	30.6402	204.268	0.204268		R	male	Cre+	1385	4.76295	20.7085	304.7	0.0679635
	008_H			DTZ + CARB	5333.5	10.4625	69.7499	0.0697499		AA	male	Cre-	11266	91.1443	396.279	1726	0.229594
	008_I			DTZ	5673.5	11.1523	74.3484	0.0743484		AB	male	Cre+	4334	34.8461	151.505	1292	0.117264
	008_L			-	6751.5	84.0381	373.503	0.373503		AP	male	Cre-	6706.5	54.1143	235.28	2779.5	0.0846482
	008_M			-	10060.5	126.36	561.601	0.561601		AR	male	Cre+	1302	10.2217	44.4421	672.5	0.0660849
										BE	female	Cre+	1476	11.6348	50.5862	1172.78	0.0431336
										BF	male	Cre-	24998.5	202.673	881.186	2086.67	0.422294
										BG	male	Cre+	18187	147.353	640.666	3465	0.184896
										BH	male	Cre+	5440.5	43.8325	190.576	2987.22	0.0637971
										BL	male	Cre+	16196	131.183	570.362	1917.22	0.297494
										BM	male	Cre-	37823.5	306.831	1334.05	3872.78	0.344468
										CA	male	Cre-	13671	110.676	481.202	1574.5	0.305622
										CB	male	Cre-	2100	16.7026	72.6201	950.5	0.076402
										CC	male	Cre+	1783	14.1281	61.4266	2232.5	0.0275147
										CD	male	Cre-	2911.5	23.2932	101.275	2194.5	0.0461494

## Sheet: Figure 5 Supp. Figure 1
Figure	Explant ID	Sex	Genotype	Average fluorescnece	4-MU [pmol]	Lysozyme activity [pmol/min]	BCA [ug]	LYZ activity [pmol/min/ug of protein]			Figure	Mouse ID	Genotype	Sex	image	Area of Tubb3 signal	% Area of Tubb3 signal
Figure 5 Supp. Figure 1 D	AC	M	Cre-	6124.5	49.3876	214.729	1987.5	0.10804			Figure 5 Supp. Figure 1 E	FC3	Cre-	female	1	972.588	10.874
	AD		Cre+	5357.5	43.1584	187.645	1267	0.148102							2	575.375	6.53
	AE		Cre+	14469	117.157	509.38	1688.5	0.301676							3	525.083	5.897
	AS		Cre-	5340	43.0163	187.027	1073.5	0.174222							4	212.554	2.398
	AT		Cre-	36372	295.043	1282.79	3121.5	0.410954							5	355.617	4.012
	AU		Cre+	27730.5	224.861	977.655	3794.5	0.257651							6	366.865	4.139
	BD		Cre+	1818	14.4124	62.6625	1685	0.0371884							7	522.217	5.891
	BI		Cre-	5235	42.1635	183.32	2344.44	0.0781932							8	412.956	4.658
	BJ		Cre+	2453	19.5695	85.0849	2778.89	0.0306183							9	315.317	3.557
	BK		Cre+	2720	21.738	94.5129	1037.78	0.0910724							10	330.569	3.729
	BO		Cre+	2720.5	21.742	94.5305	2034.44	0.046465							11	511.656	5.772
	BP		Cre-	50011.5	405.816	1764.42	2878.89	0.612881							12	533.327	6.016
															13	367.591	4.147
															14	380.92	4.297
															15	405.988	4.58
																452.575	5.0998
											Figure 5 Supp. Figure 1 E	MC7	Cre-	male	1	242.167	2.736
															2	368.48	4.139
															3	193.387	2.194
															4	337.092	3.824
															5	296.133	3.359
															6	337.352	3.827
															7	136.694	1.515
															8	1115.19	12.485
															9	133.894	1.484
															10	1314.78	14.574
															11	251.43	2.787
															12	498.439	5.525
															13	117.049	1.297
															14	27.886	0.309
															15	42.481	0.471
																360.83	4.03507
											Figure 5 Supp. Figure 1 E	POR61_2	Cre+	male	1	361.486	4.06
															2	489.199	5.494
															3	231.654	2.602
															4	578.653	6.499
															5	600.972	6.749
															6	105.963	1.199
															7	284.34	3.193
															8	301.929	3.391
															9	207.921	2.335
															10	151.465	1.701
															11	956	10.737
															12	323.404	3.632
															13	163.695	1.838
															14	208.647	2.343
															15	841.44	9.45
																387.118	4.3482
											Figure 5 Supp. Figure 1 E	POR61_6	Cre+	female	1	541.886	6.007
															2	1094.81	12.184
															3	488.186	5.411
															4	914.379	10.136
															5	606.192	6.719
															6	648.416	7.187
															7	216.898	2.404
															8	254.86	2.825
															9	183.376	2.033
															10	323.863	3.59
															11	395.781	4.387
															12	1134.91	12.58
															13	425.767	4.719
															14	515.391	5.713
															15	324.368	3.595
																537.939	5.966

## Sheet: Figure 5 Supp. Figure 2
Figure	Mouse ID	Genotype	image	# of bacteria/image	Bacteria-crypt distance		Figure	Mouse ID	Genotype	image	# of bacteria/image	Bacteria-crypt distance
Figure 5 Supp. Figure 2 - MALES	Z	Cre+	1	4	190.703		Figure 5 Supp. Figure 2 - FEMALES	AD	Cre-	1	5	169.383
					169.232							176.461
					174.739							158.425
					181.479							156.992
			2	5	103.861							155.559
					212.238					2	3	247.759
					241.008							241.772
					250.438							257.187
					270.974					3	5	241.55
			3	7	228.849							248.625
					235.544							271.767
					233.234							258.235
					223.203							351.948
					224.735					4	6	242.353
					201.507							232.768
					195.132							214.046
			4	4	182.644							214.075
					242.418							208.311
					228.85							200.052
					224.396					5	5	152.747
			5	4	277.017							146.771
					264.561							146.373
					170.766							152.579
					182.45							170.562
			6	8	222.316					6	4	192.042
					230.836							164.434
					233.401							185.444
					256.945							152.623
					253.297					7	5	186.341
					232.608							237.329
					216.72							253.053
					115.373							289.932
			7	3	85.416							311.624
					111.873					8	7	193.114
					82.231							204.371
			8	5	180.275							217.446
					172.819							256.863
					180.639							204.591
					205.288							226.041
					220.776							251.697
			9	8	271.956					9	8	189.476
					281.845							190.611
					285.409							187.832
					275.092							251.542
					211.497							253.335
					231.44							223.864
					261.37							206.26
					212.295							287.832
			10	6	188.731					10	6	286.586
					194.294							227.953
					194.967							231.436
					207.7							222.057
					212.129							216.626
					186.802							284.016
			11	5	222.247					11	4	365.901
					203.361							260.74
					213.508							217.857
					213.479							217.27
					266.97					12	6	280.991
			12	3	234.27							291.914
					262.392							320.809
					237.792							341.187
			13	4	233.138							350.265
					236.885							346.531
					220.885						64	231.19
					206.058		Figure 5 Supp. Figure 2 - FEMALES	AG	Cre+	1	4	206.326
			14	10	258.073							223.885
					288.216							249.538
					251.31							271.374
					262.792					2	5	245.458
					209.186							223.459
					212.275							204.349
					213.426							206.719
					215.17							233.002
					191.672					3	2	195.338
					220.803							195.23
				76	215.792					4	3	180.719
Figure 5 Supp. Figure 2 - MALES	Q	Cre-	1	6	120.365							216.593
					115.681							229.697
					104.211					5	5	228.931
					120.915							250.498
					163.643							262.459
					143.272							379.697
			2	4	47.736							297.773
					105.504					6	2	235.422
					108.601							289.735
					124.951					7	7	291.338
			3	7	120.797							240.407
					139.896							179.737
					98.541							215.746
					107.51							252.926
					89.808							283.425
					109.582							322.525
					106.635					8	4	187.53
			4	5	210.868							163.341
					196.306							189.747
					192.251							214.307
					156.23					9	4	364.876
					193.689							296.61
			5	6	95.847							262.572
					169.554							262.622
					137.638					10	6	184.443
					106.334							219.783
					109.544							167.781
					89.219							95.981
			6	8	134.663							99.482
					120.032							137.081
					86.866					11	8	160.056
					185.073							163.622
					139.301							162.406
					215.608							176.492
					210.358							192.313
					152.842							213.929
			7	11	136.5							210.273
					101.343							210.489
					111.131					12	2	176.991
					141.276							185.281
					158.853					13	6	194.842
					151.954							214.081
					159.701							240.312
					113.461							345.057
					126.271							356.656
					141.111							405.809
					112.635					14	7	231.88
			8	6	216.874							232.683
					212.04							234.432
					190.482							231.338
					192.809							205.201
					140.377							244.438
					154.728							217.659
			9	8	107.317					15	7	204.591
					104.418							220.422
					173.454							245.226
					172.663							269.765
					155.683							280.019
					174.916							311.005
					143.658							331.852
					122.651					16	8	229.726
			10	4	184.365							237.446
					182.872							241.75
					170.38							239.792
					170.003							246.032
			11	3	99.311							243.557
					93.506							233.68
					91.046							219.319
			12	2	127.987					17	2	236.006
					156.878							272.033
			13	3	68.025					18	2	300.551
					78.713							307.516
					109.418						84	234.94
				73	138.064		Figure 5 Supp. Figure 2 - FEMALES	AC	Cre-	1	4	120.556
Figure 5 Supp. Figure 2 - MALES	X	Cre-	1	4	76.138							102.985
					94.075							48.41
					69.385							146.388
					62.447					2	8	135.101
			2	3	66.62							166.351
					50.075							173.853
					69.115							150.448
			3	6	111.179							136.118
					127.633							141.332
					136.814							248.447
					204.966							272.42
					123.943					3	5	180.478
					111.509							128.29
			4	4	117.136							117.491
					122.202							140.132
					116.05							117.482
					104.552					4	7	205.234
			5	4	172.328							186.634
					52.326							185.919
					64.45							191.396
					108.003							207.932
			6	7	141.834							233.583
					154.586							196.989
					147.713					5	3	146.505
					154.141							148.604
					176.134							146.715
					182.956					6	6	181.554
					184.98							182.132
			7	6	168.747							168.568
					175.972							204.832
					200.221							248.325
					132.307							252.083
					97.211					7	5	183.889
					56.154							136.784
			8	6	107.427							155.871
					110.611							225.863
					115.858							301.238
					115.737					8	4	233.886
					77.72							227.075
					82.046							199.45
			9	4	73.46							195.277
					65.137					9	6	191.522
					60.016							173.578
					49.44							157.212
			10	9	143.41							191.221
					140.437							211.272
					148.079							262.708
					159.412					10	6	184.684
					179.101							190.567
					174.888							158.356
					194.511							143.879
					146.807							184.54
					147.182							203.818
			11	7	85.604						54	180.111
					98.222		Figure 5 Supp. Figure 2 - FEMALES	AB	Cre-	1	11	192.746
					110.981							179.695
					162.662							152.995
					153.811							141.3
					145.705							153.587
					155.888							172.823
			12	5	193.555							186.258
					177.432							286.789
					68.168							258.305
					79.543							270.67
					76.091							282.671
			13	4	199.744					2	4	190.753
					205.156							214.31
					90.578							165.396
					68.416							187.049
			14	4	117.688					3	5	174.772
					121.106							207.574
					104.74							111.21
					128.105							114.381
				73	122.854							158.545
Figure 5 Supp. Figure 2 - MALES	R	Cre-	1	6	217.629					4	4	174.839
					174.8							179.121
					156.171							202.485
					90.617							226.392
					76.021					5	3	105.073
					115.791							186.182
			2	4	170.715							181.632
					184.742					6	5	188.524
					178.552							204.961
					169.64							201.117
			3	2	282.572							208.832
					160.389							222.88
			4	3	233.646					7	8	132.275
					242.383							190.861
					223.619							229.291
			5	3	151.039							266.209
					147.726							238.653
					154.961							254.007
			6	2	97.73							213.526
					136.99							211.022
			7	3	172.141					8	4	150.331
					170.413							119.104
					162.464							105.066
			8	4	121.486							239.667
					100.869					9	9	157.675
					160.414							173.064
					105.755							184.365
			9	4	162.793							194.523
					197.354							183.448
					205.422							202.387
					224.475							213.476
			10	7	332.722							194.301
					314.436							201.574
					329.86					10	5	97.568
					364.21							109.667
					328.322							177.765
					306.913							186.609
					333.541							147.496
			11	5	211.597					11	3	181.533
					208.993							134.581
					231.326							173.948
					183.369					12	4	211.672
					122.143							222.002
			12	3	195.655							242.599
					111.744							193.608
					86.457					13	2	199.135
			13	4	276.274							206.235
					233.971					14	6	53.563
					233.216							55.624
					226.768							88.196
			14	2	173.396							198.781
					187.667							272.653
			15	4	229.675							253.905
					233.141						73	185.559
					252.623		Figure 5 Supp. Figure 2 - FEMALES	AF	Cre+	1	6	187.948
					245.963							180.174
			16	3	62.84							155.802
					106.399							299.647
					90.857							221.925
			17	5	198.459							334.456
					199.348					2	3	305.364
					162.327							316.008
					159.668							277.136
					140.138					3	7	236.887
			18	4	313.094							261.022
					293.51							247.777
					296.467							246.282
					198.221							289.738
			19	8	232.062							271.828
					243.552							272.472
					225.309					4	5	308.052
					217.45							288.558
					239.385							340.688
					261.041							343.199
					294.082							337.136
					305.374					5	4	342.311
				76	201.88							324.718
Figure 5 Supp. Figure 2 - MALES	Y	Cre+	1	3	96.607							313.64
					101.439							300.909
					105.426					6	2	491.986
			2	5	267.82							433.067
					284.328					7	5	438.745
					277.209							434.866
					264.872							319.821
					226.849							346.496
			3	5	265.738							371.71
					279.624					8	3	243.486
					315.682							273.066
					297.911							326.237
					290.907					9	6	386.942
			4	4	266.387							378.482
					278.047							354.046
					339.649							353.034
					294.667							348.712
			5	4	227.172							344.57
					231.265						41	313.389
					220.735
					220.846
			6	6	317.519
					293.702
					278.622
					309.081
					305.666
					261.356
			7	4	182.805
					242.991
					236.524
					247.509
			8	4	213.729
					185.933
					291.426
					297.371
			9	2	230.64
					217.393
			10	5	300.421
					246.955
					224.589
					224.16
					251.161
			11	5	259.012
					248.156
					253.139
					221.915
					212.149
			12	5	277.287
					278.452
					148.357
					141.322
					206.455
			13	4	220.869
					221.36
					208.012
					197.723
			14	3	217.396
					245.454
					287.05
			15	3	213.408
					191.848
					212.233
			16	6	230.18
					236.075
					223.791
					228.304
					213.249
					230.329
			17	5	211.75
					232.371
					330.597
					348.98
					352.918
			18	5	260.719
					281.059
					271.975
					257.822
					230.663
				78	245.066
Figure 5 Supp. Figure 2 - MALES	P	Cre+	1	5	93.784
					83.735
					117.536
					117.159
					126.079
			2	5	205.387
					191.568
					188.858
					227.853
					169.59
			3	3	135.651
					137.08
					150.294
			4	5	174.126
					111.658
					198.193
					191.276
					128.784
			5	2	157.116
					97.182
			6	3	158.379
					122.651
					182.799
			7	4	187.065
					179.747
					147.098
					113.124
			8	4	170.66
					158.02
					210.097
					204.827
			9	4	182.838
					154.534
					180.383
					168.805
			10	4	146.555
					174.31
					125.584
					145.166
			11	3	189.46
					175.497
					189.553
			12	6	225.63
					225.953
					232.231
					230.882
					203.833
					126.795
			13	3	182.024
					166.996
					133.416
			14	3	194.719
					210.564
					175.826
			15	3	207.474
					181.783
					208.512
				57	168.012
